# Supplementary material for: Asthenospheric anelasticity effects on ocean tide loading around the East China Sea observed with GPS
Source: Copernicus journal article supplement (doi:10.5194/se-11-185-2020), 2020-02-14
Supplement: Supplementary file 1 [file se-11-185-2020-supplement.zip]

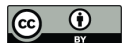

## *Supplement of*

# **Asthenospheric anelasticity effects on ocean tide loading around the East China Sea observed with GPS**

**Junjie Wang et al.**

*Correspondence to:* Junjie Wang (wangjunjie.gnss@qq.com)

- se-11-185-2020-supplement-title-page.pdf
- Table\_S1\_tide\_gauges.txt
- Table\_S2\_GPS\_observations.txt
- Table\_S3\_PREM\_Green\_function.txt
- Table\_S4\_S362ANI\_Green\_function.txt

The copyright of individual parts of the supplement might differ from the CC BY 4.0 License.
